# Supplementary material for: Visible-light activatable coumarin-based phototriggers for fluorescence imaging with ultra-high photolysis efficiency
Source: Royal Society of Chemistry journal article supplement (doi:10.1039/d2cp05807c), 2023-01-01
Supplement: d2cp05807c1.pdf [file d2cp05807c1.pdf]

## 1A-S0

0 1

|   |             |             |             |
|---|-------------|-------------|-------------|
| C | 0.31193600  | -2.09998800 | 0.13778400  |
| C | 0.75244400  | -0.96598500 | 0.81729000  |
| C | 2.10463800  | -0.51193700 | 0.69795300  |
| C | 3.00891600  | -1.26757500 | -0.07571000 |
| C | 1.28075500  | -2.87735700 | -0.63236800 |
| H | 2.00343200  | 1.31951500  | 1.86024700  |
| C | 2.64096100  | 0.66831700  | 1.27375400  |
| C | 4.33561900  | -0.92712800 | -0.26994700 |
| C | 4.86134600  | 0.24420600  | 0.32615000  |
| C | 3.95394900  | 1.04030200  | 1.09455700  |
| H | 4.93613300  | -1.57850600 | -0.88942100 |
| H | 4.29124900  | 1.95962800  | 1.55333600  |
| C | -0.19305000 | -0.19303700 | 1.70672600  |
| H | -0.91439000 | -0.84892700 | 2.19445700  |
| H | 0.34135300  | 0.34346300  | 2.48999400  |
| O | -0.90192600 | 0.76385800  | 0.87489800  |
| C | -1.79869400 | 1.54807100  | 1.51827200  |
| O | -1.99808400 | 1.45830200  | 2.72438300  |
| C | -2.48670100 | 2.49577300  | 0.61854000  |
| C | -2.21463800 | 2.56469900  | -0.76083800 |
| C | -3.44681300 | 3.35823700  | 1.16547400  |
| C | -2.88698700 | 3.47172300  | -1.56272500 |
| H | -1.47582100 | 1.90593500  | -1.20186800 |
| C | -4.12912200 | 4.27304100  | 0.37043600  |
| H | -3.65901500 | 3.30759100  | 2.22793000  |
| C | -3.84892700 | 4.33166300  | -1.00332500 |
| H | -2.68594400 | 3.53397600  | -2.62701200 |
| H | -4.86674600 | 4.92686400  | 0.81827500  |
| O | -4.45492700 | 5.18463900  | -1.87387400 |
| C | -5.44881200 | 6.08453400  | -1.36601200 |
| H | -5.79341000 | 6.65818100  | -2.22670900 |
| H | -6.29088000 | 5.53773400  | -0.92969500 |
| H | -5.02272700 | 6.76371500  | -0.62059400 |
| O | 1.07132000  | -3.91735200 | -1.24530900 |
| O | 2.58445000  | -2.42049200 | -0.69189800 |
| N | 6.18183100  | 0.58749800  | 0.19587200  |
| C | 7.08863900  | -0.20869400 | -0.64325600 |
| C | 6.98934100  | 0.06288900  | -2.14708900 |
| H | 6.91246300  | -1.26937000 | -0.44098500 |
| H | 8.10437400  | 0.00162800  | -0.29933800 |

|   |             |             |             |
|---|-------------|-------------|-------------|
| H | 7.67216500  | -0.60384000 | -2.68450400 |
| H | 5.97774900  | -0.11486900 | -2.52370200 |
| H | 7.26638900  | 1.09391000  | -2.38403000 |
| C | 6.68926900  | 1.86997900  | 0.70641300  |
| C | 6.35044700  | 3.09005000  | -0.15449800 |
| H | 7.77404300  | 1.76804600  | 0.78477500  |
| H | 6.32428700  | 2.01704800  | 1.72730400  |
| H | 6.74936500  | 3.99355000  | 0.31895900  |
| H | 6.79041700  | 3.00707200  | -1.15217500 |
| H | 5.26966200  | 3.21714400  | -0.26703000 |
| C | -1.08635100 | -2.50887500 | 0.16055400  |
| H | -1.75823800 | -1.78398100 | 0.61002000  |
| C | -1.64712600 | -3.64467700 | -0.32573600 |
| H | -1.02602400 | -4.39863200 | -0.79389900 |
| C | -3.05376700 | -3.97214000 | -0.28471600 |
| C | -3.63194900 | -5.13134100 | -0.76511700 |
| S | -4.29688300 | -2.92619300 | 0.40101400  |
| C | -5.04321200 | -5.18882800 | -0.58942500 |
| H | -3.04618200 | -5.91624400 | -1.23103600 |
| C | -5.54705700 | -4.07443400 | 0.02364400  |
| H | -5.65885700 | -6.02321400 | -0.90566900 |
| H | -6.57454000 | -3.85138400 | 0.27872600  |

## 1B-S0

|     |             |             |             |
|-----|-------------|-------------|-------------|
| 0 1 |             |             |             |
| C   | 0.29002300  | -1.97951900 | 0.11169800  |
| C   | 0.95957000  | -0.97114500 | 0.80152500  |
| C   | 2.37919300  | -0.81373200 | 0.68970400  |
| C   | 3.10569400  | -1.73586200 | -0.08924500 |
| C   | 1.07713800  | -2.94011900 | -0.66068400 |
| H   | 2.66498600  | 0.98666300  | 1.86963900  |
| C   | 3.15166500  | 0.21874000  | 1.27966000  |
| C   | 4.47587100  | -1.68395800 | -0.27718800 |
| C   | 5.23662300  | -0.66011100 | 0.33626000  |
| C   | 4.51573000  | 0.30233800  | 1.11068300  |
| H   | 4.92596500  | -2.44330500 | -0.90140900 |
| H   | 5.03802000  | 1.12493900  | 1.57956400  |
| C   | 0.19840000  | -0.01692800 | 1.69036500  |
| H   | -0.66062100 | -0.49697800 | 2.15963400  |
| H   | 0.82726600  | 0.37721100  | 2.48790100  |
| O   | -0.26321800 | 1.08428100  | 0.86165000  |

|   |             |             |             |
|---|-------------|-------------|-------------|
| C | -0.90921000 | 2.08061100  | 1.51079900  |
| O | -1.09418400 | 2.06020800  | 2.72242200  |
| C | -1.35106700 | 3.16393700  | 0.60872600  |
| C | -1.12571500 | 3.13172400  | -0.78046100 |
| C | -2.02124900 | 4.26357400  | 1.16231500  |
| C | -1.56125800 | 4.17114000  | -1.58526500 |
| H | -0.60995200 | 2.28996500  | -1.22730900 |
| C | -2.46258600 | 5.31411800  | 0.36463600  |
| H | -2.19702400 | 4.29246900  | 2.23218400  |
| C | -2.23284900 | 5.26921800  | -1.01892800 |
| H | -1.39387100 | 4.15671100  | -2.65707200 |
| H | -2.97723100 | 6.15173700  | 0.81812200  |
| O | -2.62128600 | 6.23784800  | -1.89295800 |
| C | -3.30997400 | 7.38480100  | -1.37751300 |
| H | -3.52116600 | 8.01427100  | -2.24225500 |
| H | -4.25024200 | 7.09790700  | -0.89566700 |
| H | -2.68392800 | 7.93538300  | -0.66798300 |
| O | 0.65499200  | -3.91000800 | -1.27920600 |
| O | 2.44769500  | -2.76747600 | -0.71685200 |
| N | 6.60216000  | -0.60678600 | 0.21642600  |
| C | 7.31856900  | -1.54398300 | -0.65969000 |
| C | 7.25888200  | -1.21206400 | -2.15361400 |
| H | 6.93508600  | -2.55384100 | -0.48441300 |
| H | 8.35983400  | -1.55315900 | -0.32900500 |
| H | 7.78587400  | -1.98637500 | -2.72137600 |
| H | 6.22802800  | -1.16992800 | -2.51728700 |
| H | 7.73632800  | -0.25151700 | -2.36639000 |
| C | 7.37221700  | 0.51186300  | 0.77903600  |
| C | 7.34796600  | 1.79954400  | -0.04902500 |
| H | 8.40259000  | 0.16325600  | 0.88308800  |
| H | 7.01681300  | 0.71164800  | 1.79406800  |
| H | 7.92255400  | 2.57690800  | 0.46603300  |
| H | 7.79347600  | 1.64646100  | -1.03592500 |
| H | 6.32793500  | 2.16989600  | -0.18821700 |
| C | -1.16277800 | -2.08337700 | 0.12483300  |
| H | -1.66892100 | -1.23200500 | 0.56993300  |
| C | -1.94925600 | -3.07759600 | -0.36408100 |
| H | -1.49764700 | -3.94498300 | -0.83111000 |
| C | -3.38776800 | -3.10987500 | -0.32809000 |
| C | -4.19765500 | -4.11239000 | -0.81754900 |
| S | -4.38389800 | -1.82503300 | 0.38369300  |
| C | -5.59478500 | -3.89644100 | -0.64640400 |
| H | -3.78652000 | -4.99547200 | -1.29508700 |
| C | -5.85068000 | -2.70572300 | -0.01418200 |

|   |             |             |             |
|---|-------------|-------------|-------------|
| H | -6.36251700 | -4.58477000 | -0.97413100 |
| O | -7.00951100 | -2.11619400 | 0.34267200  |
| C | -8.20599600 | -2.85035600 | 0.02671900  |
| H | -9.03281400 | -2.23608100 | 0.38205300  |
| H | -8.28965800 | -3.00202300 | -1.05385600 |
| H | -8.20956800 | -3.81678800 | 0.54014400  |

## 1a-S0

|     |             |             |             |
|-----|-------------|-------------|-------------|
| 0 1 |             |             |             |
| C   | 0.26597800  | -2.05322700 | 0.16618400  |
| C   | 0.74380500  | -0.92858100 | 0.83478200  |
| C   | 2.10794200  | -0.51400700 | 0.70611900  |
| C   | 2.98553700  | -1.30057000 | -0.06729900 |
| C   | 1.20566000  | -2.85989500 | -0.60913600 |
| H   | 2.06584400  | 1.32606800  | 1.85837500  |
| C   | 2.68123100  | 0.65321600  | 1.27252600  |
| C   | 4.32101100  | -1.00065200 | -0.26930700 |
| C   | 4.88357100  | 0.15852700  | 0.31692600  |
| C   | 4.00358900  | 0.98546200  | 1.08474300  |
| H   | 4.89846300  | -1.67325800 | -0.88808100 |
| H   | 4.37016400  | 1.89697700  | 1.53643400  |
| C   | -0.17348300 | -0.12465700 | 1.72678500  |
| H   | -0.89740000 | -0.76127600 | 2.23565000  |
| H   | 0.38219500  | 0.41511700  | 2.49264700  |
| O   | -0.87894100 | 0.83093800  | 0.89084800  |
| C   | -1.77310500 | 1.62129900  | 1.53023900  |
| O   | -1.97153200 | 1.53955300  | 2.73708200  |
| C   | -2.46008000 | 2.56445700  | 0.62494300  |
| C   | -2.18946300 | 2.62329000  | -0.75521800 |
| C   | -3.41780100 | 3.43267000  | 1.16698500  |
| C   | -2.86090300 | 3.52605400  | -1.56261500 |
| H   | -1.45243400 | 1.96006700  | -1.19252700 |
| C   | -4.09925800 | 4.34322700  | 0.36634800  |
| H   | -3.62882000 | 3.38992600  | 2.23002500  |
| C   | -3.82051200 | 4.39176700  | -1.00811700 |
| H   | -2.66092700 | 3.58051700  | -2.62752500 |
| H   | -4.83505400 | 5.00164000  | 0.81045800  |
| O   | -4.42580600 | 5.23981900  | -1.88387600 |
| C   | -5.41688800 | 6.14564500  | -1.38110200 |
| H   | -5.76100900 | 6.71424400  | -2.24532500 |
| H   | -6.25981200 | 5.60392600  | -0.94012900 |

|   |             |             |             |
|---|-------------|-------------|-------------|
| H | -4.98828000 | 6.82879600  | -0.64078000 |
| O | 0.96334900  | -3.89291300 | -1.22141500 |
| O | 2.52350100  | -2.44232000 | -0.67624300 |
| N | 6.21266400  | 0.46323200  | 0.17837700  |
| C | 7.09328800  | -0.36563600 | -0.65691000 |
| C | 6.99900000  | -0.10129500 | -2.16236100 |
| H | 6.88554400  | -1.41904500 | -0.44696100 |
| H | 8.11575800  | -0.18388800 | -0.31645000 |
| H | 7.65948400  | -0.79250700 | -2.69675600 |
| H | 5.98138200  | -0.25007900 | -2.53532900 |
| H | 7.30732700  | 0.91899900  | -2.40700900 |
| C | 6.75772700  | 1.73665100  | 0.67314100  |
| C | 6.44280700  | 2.95766600  | -0.19539500 |
| H | 7.84008900  | 1.60701700  | 0.74256500  |
| H | 6.40632400  | 1.90200700  | 1.69606600  |
| H | 6.86977200  | 3.85438600  | 0.26635700  |
| H | 6.87096600  | 2.85455300  | -1.19632500 |
| H | 5.36475700  | 3.11236100  | -0.29910100 |
| C | -1.14710200 | -2.41956000 | 0.20637600  |
| H | -1.78997800 | -1.66016900 | 0.63744500  |
| C | -1.74193000 | -3.55185300 | -0.23883400 |
| H | -1.13370000 | -4.33239000 | -0.67914300 |
| C | -3.17748600 | -3.84553000 | -0.17888700 |
| C | -4.15037900 | -2.94539400 | 0.30505900  |
| C | -3.61683100 | -5.10545400 | -0.63317200 |
| C | -5.49665900 | -3.29760600 | 0.33540800  |
| H | -3.85629100 | -1.96183500 | 0.65788300  |
| C | -4.96531100 | -5.45740500 | -0.60203700 |
| H | -2.88332900 | -5.81201900 | -1.01263500 |
| C | -5.91343800 | -4.55463900 | -0.11670600 |
| H | -6.22715700 | -2.58752700 | 0.71235000  |
| H | -5.27511800 | -6.43589200 | -0.95749000 |
| H | -6.96507900 | -4.82377900 | -0.09130100 |

## 1b-S0

|     |            |             |             |
|-----|------------|-------------|-------------|
| 0 1 |            |             |             |
| C   | 0.40468800 | -1.78944300 | 0.21502800  |
| C   | 1.23359200 | -0.87335500 | 0.85764900  |
| C   | 2.65727900 | -0.92819100 | 0.70738400  |
| C   | 3.21828600 | -1.97038700 | -0.05711100 |
| C   | 1.01932200 | -2.87436400 | -0.54779100 |

|   |             |             |             |
|---|-------------|-------------|-------------|
| H | 3.23574800  | 0.84503700  | 1.81852000  |
| C | 3.58858600  | -0.00292000 | 1.24316100  |
| C | 4.57573100  | -2.12699400 | -0.27665700 |
| C | 5.49498600  | -1.20735800 | 0.28215000  |
| C | 4.94474200  | -0.12479200 | 1.03801200  |
| H | 4.89268000  | -2.96215500 | -0.88556200 |
| H | 5.59462300  | 0.62579900  | 1.46636800  |
| C | 0.64187800  | 0.19580900  | 1.74566100  |
| H | -0.24560100 | -0.16304700 | 2.26746700  |
| H | 1.35208100  | 0.53080700  | 2.50082900  |
| O | 0.27887100  | 1.32384400  | 0.90459800  |
| C | -0.29265100 | 2.37177000  | 1.54292200  |
| O | -0.48558200 | 2.37364500  | 2.75353000  |
| C | -0.64606200 | 3.47962500  | 0.63207100  |
| C | -0.40551900 | 3.42743100  | -0.75391000 |
| C | -1.24504200 | 4.62501400  | 1.17448500  |
| C | -0.75682900 | 4.49240500  | -1.56640400 |
| H | 0.05647300  | 2.55064000  | -1.19213800 |
| C | -1.60265400 | 5.70098500  | 0.36886300  |
| H | -1.43189900 | 4.66926500  | 2.24196200  |
| C | -1.35831100 | 5.63608200  | -1.01147300 |
| H | -0.57669900 | 4.46338500  | -2.63583900 |
| H | -2.06419700 | 6.57320600  | 0.81414000  |
| O | -1.66734900 | 6.62596300  | -1.89314200 |
| C | -2.28693100 | 7.81758000  | -1.39169600 |
| H | -2.44081900 | 8.45722500  | -2.26104100 |
| H | -3.25229100 | 7.59511400  | -0.92579600 |
| H | -1.63808200 | 8.32770600  | -0.67248300 |
| O | 0.44441100  | -3.78489800 | -1.13237000 |
| O | 2.39971100  | -2.91007700 | -0.63663000 |
| N | 6.84947200  | -1.36008400 | 0.12926600  |
| C | 7.39637400  | -2.44362700 | -0.69905800 |
| C | 7.37100100  | -2.18521800 | -2.20835200 |
| H | 6.85923900  | -3.36830100 | -0.46713300 |
| H | 8.42724900  | -2.60130200 | -0.37266200 |
| H | 7.76254200  | -3.06155200 | -2.73594100 |
| H | 6.35510900  | -1.99973800 | -2.56946200 |
| H | 7.99114400  | -1.32460600 | -2.47423600 |
| C | 7.79039300  | -0.33325500 | 0.60104100  |
| C | 7.89611500  | 0.90903700  | -0.28802000 |
| H | 8.76859900  | -0.81441900 | 0.67315300  |
| H | 7.52022100  | -0.04330600 | 1.62087600  |
| H | 8.59993800  | 1.61952700  | 0.15863600  |
| H | 8.26039200  | 0.65298000  | -1.28686300 |

|   |              |             |             |
|---|--------------|-------------|-------------|
| H | 6.93092300   | 1.41274200  | -0.39534900 |
| C | -1.04984300  | -1.66878500 | 0.26638900  |
| H | -1.40264600  | -0.72478700 | 0.66721000  |
| C | -1.98841000  | -2.55774400 | -0.14073800 |
| H | -1.67134900  | -3.50852200 | -0.55173800 |
| C | -3.43779200  | -2.36646400 | -0.07979100 |
| C | -4.06905500  | -1.18972000 | 0.38410300  |
| C | -4.27204700  | -3.41473400 | -0.50786800 |
| C | -5.44943200  | -1.07924200 | 0.41821300  |
| H | -3.47457300  | -0.34660100 | 0.72176500  |
| C | -5.66336500  | -3.31992300 | -0.47974100 |
| H | -3.81774300  | -4.33218800 | -0.87261800 |
| C | -6.26129100  | -2.14378300 | -0.01231900 |
| H | -5.92637700  | -0.17199400 | 0.77575900  |
| H | -6.26226000  | -4.15593700 | -0.81931000 |
| O | -7.61052800  | -1.93256900 | 0.06415700  |
| C | -8.49612200  | -2.98557100 | -0.36267300 |
| C | -9.91611200  | -2.49490000 | -0.16797600 |
| H | -8.30470300  | -3.88681800 | 0.23220700  |
| H | -8.30091800  | -3.22206200 | -1.41571100 |
| H | -10.61826500 | -3.27185700 | -0.48459900 |
| H | -10.10930800 | -2.26398300 | 0.88392000  |
| H | -10.10481900 | -1.59673900 | -0.76365200 |

## 1A-IM1

0 1

|   |             |             |            |
|---|-------------|-------------|------------|
| C | -1.24044600 | 1.50110200  | 0.65998100 |
| C | -1.44233300 | 0.07990800  | 0.94669000 |
| C | -2.79017800 | -0.45125700 | 0.72121600 |
| C | -3.85376000 | 0.43135000  | 0.51896000 |
| C | -2.44400700 | 2.38939700  | 0.75536300 |
| H | -2.33943700 | -2.56221800 | 0.77333500 |
| C | -3.12016200 | -1.81796600 | 0.65606900 |
| C | -5.15833600 | 0.03878600  | 0.27291100 |
| C | -5.48346800 | -1.33809400 | 0.22116700 |
| C | -4.40914200 | -2.25487900 | 0.41029100 |
| H | -5.90010400 | 0.81344700  | 0.13697900 |
| H | -4.58338200 | -3.32060900 | 0.35296700 |
| C | -0.41535200 | -0.66093300 | 1.44702900 |
| H | 0.55901800  | -0.23727700 | 1.66125400 |
| H | -0.55532800 | -1.70572400 | 1.70191900 |

|   |             |             |             |
|---|-------------|-------------|-------------|
| O | 2.30268200  | -0.32804100 | -0.47383000 |
| C | 3.10629100  | -0.57539600 | 0.47862100  |
| O | 2.95309800  | -0.20641200 | 1.68193500  |
| C | 4.35064000  | -1.37804800 | 0.14623900  |
| C | 4.62433600  | -1.77965100 | -1.17169700 |
| C | 5.25870000  | -1.74122000 | 1.14671100  |
| C | 5.76293600  | -2.51329700 | -1.47753300 |
| H | 3.93016700  | -1.50717000 | -1.95945800 |
| C | 6.40785100  | -2.48052700 | 0.86177700  |
| H | 5.05849700  | -1.43774300 | 2.16881000  |
| C | 6.66257400  | -2.86866200 | -0.45981900 |
| H | 5.97634000  | -2.82242600 | -2.49619000 |
| H | 7.08788400  | -2.74549400 | 1.66233800  |
| O | 7.75685800  | -3.59264200 | -0.85734900 |
| C | 8.70495700  | -3.98021300 | 0.14112200  |
| H | 9.48044500  | -4.53799600 | -0.38540200 |
| H | 9.15247900  | -3.10623100 | 0.62690500  |
| H | 8.24538800  | -4.62391000 | 0.89907400  |
| O | -2.41336500 | 3.58826900  | 0.96210100  |
| O | -3.66190700 | 1.81385800  | 0.60318300  |
| N | -6.77802800 | -1.76567800 | 0.03006600  |
| C | -7.84330500 | -0.80992300 | -0.29861700 |
| C | -7.84403600 | -0.30131800 | -1.74362400 |
| H | -7.78708100 | 0.03615700  | 0.39419100  |
| H | -8.79181400 | -1.30983300 | -0.08741200 |
| H | -8.64954900 | 0.42927500  | -1.87494600 |
| H | -6.90024100 | 0.18884400  | -2.00023400 |
| H | -8.00801400 | -1.11788200 | -2.45234800 |
| C | -7.08780300 | -3.19478400 | -0.10637100 |
| C | -6.78560300 | -3.80316400 | -1.47920400 |
| H | -8.15165600 | -3.30945100 | 0.11706400  |
| H | -6.55452200 | -3.74763300 | 0.67291500  |
| H | -7.01145900 | -4.87496300 | -1.46387300 |
| H | -7.39337600 | -3.34061800 | -2.26197900 |
| H | -5.73210300 | -3.68420000 | -1.74954900 |
| C | -0.00384700 | 1.99754300  | 0.29031300  |
| H | 0.79596700  | 1.26774200  | 0.16025300  |
| C | 0.27701100  | 3.34912200  | -0.00060900 |
| H | -0.53017900 | 4.07210100  | 0.04883800  |
| C | 1.51565900  | 3.87148000  | -0.35652600 |
| C | 1.74551400  | 5.23552500  | -0.64489800 |
| S | 3.03405700  | 2.96101300  | -0.48648400 |
| C | 3.07334100  | 5.52377500  | -0.95043700 |
| H | 0.94134200  | 5.96208300  | -0.61986500 |



|   |            |            |             |
|---|------------|------------|-------------|
| C | 3.87682300 | 4.39052300 | -0.89940000 |
| H | 3.45242500 | 6.50658400 | -1.19959900 |
| H | 4.94152100 | 4.34336400 | -1.09536500 |

## 1B-IM1

0 1

|   |             |             |             |
|---|-------------|-------------|-------------|
| C | -2.59815900 | -0.67156000 | 0.82443000  |
| C | -1.12961300 | -0.57043700 | 0.80867600  |
| C | -0.41264500 | -1.82771600 | 0.56128000  |
| C | -1.08639900 | -3.04396000 | 0.69239700  |
| C | -3.18855200 | -1.97758300 | 1.25091500  |
| H | 1.51628800  | -1.02014500 | 0.00133900  |
| C | 0.93418900  | -1.92243900 | 0.16322700  |
| C | -0.50909600 | -4.28349300 | 0.47299100  |
| C | 0.85186900  | -4.37150700 | 0.09323000  |
| C | 1.54861600  | -3.14053200 | -0.06946100 |
| H | -1.12756000 | -5.15931400 | 0.61228500  |
| H | 2.58113700  | -3.13257300 | -0.39167700 |
| C | -0.51925800 | 0.61666700  | 1.04752100  |
| H | -1.09156700 | 1.50885200  | 1.27524900  |
| H | 0.56119900  | 0.71666200  | 1.06617600  |
| O | 3.47520200  | 0.41651600  | -0.63266100 |
| C | 3.66335300  | 1.34471600  | 0.21151300  |
| O | 2.88315600  | 1.63787800  | 1.16759200  |
| C | 4.92552300  | 2.17533600  | 0.06345100  |
| C | 5.84582100  | 1.91367500  | -0.96486300 |
| C | 5.20601200  | 3.22512400  | 0.94480800  |
| C | 7.00137000  | 2.67066000  | -1.10646700 |
| H | 5.64209500  | 1.10418800  | -1.65750000 |
| C | 6.36169700  | 3.99859700  | 0.82090300  |
| H | 4.50416000  | 3.44090900  | 1.74347600  |
| C | 7.26578600  | 3.71975400  | -0.21182300 |
| H | 7.71267100  | 2.46884400  | -1.90153100 |
| H | 6.54641600  | 4.80363500  | 1.52190100  |
| O | 8.42971100  | 4.41135500  | -0.43059400 |
| C | 8.74282200  | 5.49413000  | 0.44983200  |
| H | 9.69359100  | 5.89748600  | 0.09893500  |
| H | 7.97796900  | 6.27730000  | 0.40685200  |
| H | 8.85420900  | 5.14885500  | 1.48345800  |
| O | -4.30557400 | -2.12124000 | 1.71433800  |
| O | -2.42090100 | -3.08715400 | 1.11634200  |

|   |             |             |             |
|---|-------------|-------------|-------------|
| N | 1.47352600  | -5.58924200 | -0.07916300 |
| C | 0.70138500  | -6.83695500 | -0.04404200 |
| C | -0.12993300 | -7.12981700 | -1.29725900 |
| H | 0.05307800  | -6.82861100 | 0.83854500  |
| H | 1.41744400  | -7.64705500 | 0.11558200  |
| H | -0.69445400 | -8.05775600 | -1.15500300 |
| H | -0.84585100 | -6.32871200 | -1.50351600 |
| H | 0.50739000  | -7.25245700 | -2.17746400 |
| C | 2.85984300  | -5.66631100 | -0.55615900 |
| C | 3.04813900  | -5.46512300 | -2.06304200 |
| H | 3.23722900  | -6.65167800 | -0.27033000 |
| H | 3.46423300  | -4.93961100 | -0.00466600 |
| H | 4.11529100  | -5.50007800 | -2.30801800 |
| H | 2.54399900  | -6.24897700 | -2.63543600 |
| H | 2.65847400  | -4.49717400 | -2.39214500 |
| C | -3.39747700 | 0.37520900  | 0.43824700  |
| H | -2.87756500 | 1.26247500  | 0.08685700  |
| C | -4.81829400 | 0.39124400  | 0.39379500  |
| H | -5.36230200 | -0.50917600 | 0.65771700  |
| C | -5.58716200 | 1.46895800  | 0.02573600  |
| C | -7.00978700 | 1.46490100  | -0.04419900 |
| S | -4.95795700 | 3.07594700  | -0.42075500 |
| C | -7.57317400 | 2.65822800  | -0.43229300 |
| H | -7.57487800 | 0.57103800  | 0.19526600  |
| C | -6.58769500 | 3.64117900  | -0.67573900 |
| H | -8.63277500 | 2.84322300  | -0.54318000 |
| O | -6.72487000 | 4.88004700  | -1.05496100 |
| C | -8.06867700 | 5.40288000  | -1.28151400 |
| H | -7.91597200 | 6.43648900  | -1.58282400 |
| H | -8.54883800 | 4.83229900  | -2.07781300 |
| H | -8.63927100 | 5.34844000  | -0.35331400 |

### 1a-IM1

|     |            |             |             |
|-----|------------|-------------|-------------|
| 0 1 |            |             |             |
| C   | 1.25075300 | 1.44033300  | -0.71248900 |
| C   | 1.43864000 | 0.00364500  | -0.88683700 |
| C   | 2.78981600 | -0.52150500 | -0.67912900 |
| C   | 3.86191800 | 0.36735800  | -0.56115900 |
| C   | 2.45531000 | 2.30851900  | -0.92404100 |
| H   | 2.33190900 | -2.63074000 | -0.59551500 |
| C   | 3.11675500 | -1.88374000 | -0.54130100 |

|   |             |             |             |
|---|-------------|-------------|-------------|
| C | 5.16975500  | -0.01471200 | -0.31964500 |
| C | 5.49030100  | -1.38748000 | -0.18641100 |
| C | 4.40938600  | -2.30984100 | -0.29877200 |
| H | 5.91803200  | 0.76282000  | -0.25303500 |
| H | 4.58196700  | -3.37076500 | -0.18050500 |
| C | 0.38334600  | -0.76350700 | -1.28715400 |
| H | -0.59554500 | -0.34686200 | -1.49769500 |
| H | 0.50600100  | -1.82526300 | -1.47170600 |
| O | -2.48198100 | -0.27275500 | 0.55790000  |
| C | -3.20612600 | -0.61415700 | -0.43147200 |
| O | -2.95826800 | -0.34595100 | -1.64394400 |
| C | -4.46435800 | -1.40412900 | -0.12836800 |
| C | -4.82082800 | -1.71895800 | 1.19334600  |
| C | -5.30259100 | -1.84284600 | -1.15911900 |
| C | -5.97147200 | -2.44373600 | 1.47361000  |
| H | -4.18085900 | -1.38654700 | 2.00364000  |
| C | -6.46343000 | -2.57302700 | -0.89957500 |
| H | -5.03853700 | -1.60711900 | -2.18453700 |
| C | -6.80053600 | -2.87570200 | 0.42595200  |
| H | -6.24831800 | -2.68756700 | 2.49468900  |
| H | -7.08927300 | -2.89721000 | -1.72226000 |
| O | -7.91276600 | -3.58449700 | 0.79930700  |
| C | -8.78931100 | -4.05064900 | -0.23059400 |
| H | -9.59321400 | -4.58159400 | 0.28077900  |
| H | -9.21096400 | -3.21721700 | -0.80292100 |
| H | -8.27509100 | -4.73798200 | -0.91113100 |
| O | 2.42321000  | 3.47944000  | -1.25041600 |
| O | 3.67197700  | 1.74101700  | -0.73710800 |
| N | 6.78555100  | -1.80751900 | 0.00860700  |
| C | 7.85628100  | -0.83845300 | 0.27692900  |
| C | 7.86127500  | -0.24561300 | 1.68928900  |
| H | 7.80283200  | -0.03453700 | -0.46466500 |
| H | 8.80165800  | -1.35492200 | 0.09430100  |
| H | 8.67203100  | 0.48566900  | 1.77696100  |
| H | 6.92129200  | 0.26576900  | 1.91676900  |
| H | 8.01979800  | -1.02012300 | 2.44488200  |
| C | 7.09689800  | -3.22922700 | 0.20714100  |
| C | 6.82884200  | -3.76824300 | 1.61544800  |
| H | 8.15456200  | -3.35748100 | -0.03733500 |
| H | 6.54319400  | -3.81755600 | -0.53056800 |
| H | 7.05487900  | -4.83960100 | 1.64765100  |
| H | 7.45571900  | -3.26796000 | 2.35895200  |
| H | 5.78229400  | -3.63517100 | 1.90557700  |
| C | 0.02649700  | 1.97059100  | -0.32689500 |

|   |             |            |             |
|---|-------------|------------|-------------|
| H | -0.76027300 | 1.25214100 | -0.11114200 |
| C | -0.23745400 | 3.33368400 | -0.12726100 |
| H | 0.56760000  | 4.03804000 | -0.30306300 |
| C | -1.47240500 | 3.89245800 | 0.29259100  |
| C | -2.63349100 | 3.11968400 | 0.58525400  |
| C | -1.53717600 | 5.30992500 | 0.41546400  |
| C | -3.79917200 | 3.75341000 | 0.97763600  |
| H | -2.60730300 | 2.03656400 | 0.51447200  |
| C | -2.71100000 | 5.93021200 | 0.80635000  |
| H | -0.65077600 | 5.89570900 | 0.19299700  |
| C | -3.84243500 | 5.15228400 | 1.08674700  |
| H | -4.68366100 | 3.16752900 | 1.20372100  |
| H | -2.75642800 | 7.01002800 | 0.89646600  |
| H | -4.76368500 | 5.63710600 | 1.39483700  |

### 1b-IM1

|     |             |             |             |
|-----|-------------|-------------|-------------|
| 0 1 |             |             |             |
| C   | 1.71392400  | -0.88024300 | 0.95200300  |
| C   | 2.19292800  | 0.50704900  | 0.90548300  |
| C   | 3.61845800  | 0.68151800  | 0.60005400  |
| C   | 4.48126100  | -0.41348600 | 0.67775200  |
| C   | 2.71108600  | -1.92392600 | 1.35154300  |
| H   | 3.59398400  | 2.77286700  | 0.07272800  |
| C   | 4.21138200  | 1.88734000  | 0.18289000  |
| C   | 5.83310400  | -0.36444500 | 0.38147400  |
| C   | 6.42347800  | 0.85568400  | -0.02707700 |
| C   | 5.55672300  | 1.98162800  | -0.12654700 |
| H   | 6.40342500  | -1.27745600 | 0.48136600  |
| H   | 5.93670400  | 2.93833500  | -0.45822700 |
| C   | 1.34494900  | 1.53453000  | 1.16648800  |
| H   | 0.30468100  | 1.38213400  | 1.43170400  |
| H   | 1.69672700  | 2.56049600  | 1.15990700  |
| O   | -1.94330700 | 1.31499300  | -0.50945100 |
| C   | -2.49228000 | 1.95570200  | 0.44302300  |
| O   | -2.03544100 | 2.04561600  | 1.62072300  |
| C   | -3.79866600 | 2.66359000  | 0.13926800  |
| C   | -4.36870700 | 2.61068200  | -1.14351100 |
| C   | -4.47028600 | 3.39000200  | 1.12856400  |
| C   | -5.56392300 | 3.25843400  | -1.42599700 |
| H   | -3.85982800 | 2.05211100  | -1.92179900 |
| C   | -5.67292000 | 4.04820500  | 0.86619000  |

|   |             |             |             |
|---|-------------|-------------|-------------|
| H | -4.04117700 | 3.43930700  | 2.12384400  |
| C | -6.22379100 | 3.98235900  | -0.42008000 |
| H | -6.00502500 | 3.21842800  | -2.41723500 |
| H | -6.16600800 | 4.60081200  | 1.65676600  |
| O | -7.39609200 | 4.58747700  | -0.79265000 |
| C | -8.10502900 | 5.34377300  | 0.19306200  |
| H | -8.99112700 | 5.73218800  | -0.31061700 |
| H | -8.41246300 | 4.71360900  | 1.03471800  |
| H | -7.50209600 | 6.17976000  | 0.56395500  |
| O | 2.43857000  | -2.99065600 | 1.87015900  |
| O | 4.02217700  | -1.65790000 | 1.12401600  |
| N | 7.77383500  | 0.95238900  | -0.28307400 |
| C | 8.62518700  | -0.24345300 | -0.27803600 |
| C | 8.52071800  | -1.12997600 | -1.52313800 |
| H | 8.40239300  | -0.83164500 | 0.61802400  |
| H | 9.65543900  | 0.10267800  | -0.16265600 |
| H | 9.16018900  | -2.01097600 | -1.40130700 |
| H | 7.49636700  | -1.47754100 | -1.68709300 |
| H | 8.84749700  | -0.59593100 | -2.41982000 |
| C | 8.35100500  | 2.18787100  | -0.82803200 |
| C | 8.11010400  | 2.42114800  | -2.32278200 |
| H | 9.42590200  | 2.14481500  | -0.63481000 |
| H | 7.97514000  | 3.03963400  | -0.25258800 |
| H | 8.54767500  | 3.38041900  | -2.62002500 |
| H | 8.57249600  | 1.63610900  | -2.92769700 |
| H | 7.04235400  | 2.45021800  | -2.55958600 |
| C | 0.42008300  | -1.21137600 | 0.60889700  |
| H | -0.21140400 | -0.39398600 | 0.27336100  |
| C | -0.11608100 | -2.52149000 | 0.58942100  |
| H | 0.54173900  | -3.33732700 | 0.86651900  |
| C | -1.42277700 | -2.87382300 | 0.23142100  |
| C | -2.43869500 | -1.93590100 | -0.15556800 |
| C | -1.76557600 | -4.26415900 | 0.25987100  |
| C | -3.69299700 | -2.37224700 | -0.48328900 |
| H | -2.22183700 | -0.87193200 | -0.19889900 |
| C | -3.02278700 | -4.70811500 | -0.06744200 |
| H | -1.00296000 | -4.97950100 | 0.55128600  |
| C | -4.00691100 | -3.75935900 | -0.44369800 |
| H | -4.47295900 | -1.67975300 | -0.77959000 |
| H | -3.25457800 | -5.76446300 | -0.03596100 |
| O | -5.25286100 | -4.07036100 | -0.77914700 |
| C | -5.69631700 | -5.46072800 | -0.77680400 |
| C | -7.15045000 | -5.46458000 | -1.18994600 |
| H | -5.55825600 | -5.86389700 | 0.23052000  |

|   |             |             |             |
|---|-------------|-------------|-------------|
| H | -5.07234100 | -6.02160900 | -1.47871600 |
| H | -7.51507400 | -6.49581500 | -1.19847100 |
| H | -7.75939500 | -4.88898200 | -0.48726700 |
| H | -7.27455500 | -5.04643600 | -2.19275900 |

## 1A-IM2

|     |             |             |             |
|-----|-------------|-------------|-------------|
| 1 1 |             |             |             |
| C   | 1.28086200  | 1.33767300  | -0.38441000 |
| C   | 0.75385400  | 0.00204000  | -0.37320800 |
| C   | -0.58822800 | -0.20770500 | -0.14878200 |
| C   | -1.42348600 | 0.93830300  | 0.09033400  |
| C   | 0.42901400  | 2.50141200  | -0.13240900 |
| H   | -0.63509900 | -2.37214000 | -0.31046300 |
| C   | -1.23468000 | -1.48660100 | -0.12929600 |
| C   | -2.76418400 | 0.83617300  | 0.32769000  |
| C   | -3.39589900 | -0.44999400 | 0.34961300  |
| C   | -2.56884900 | -1.61138100 | 0.10303300  |
| H   | -3.32148700 | 1.74664500  | 0.49224400  |
| H   | -3.00993800 | -2.59751300 | 0.09714800  |
| C   | 1.86900700  | -0.96590700 | -0.63302300 |
| H   | 1.63909300  | -1.62972600 | -1.47159300 |
| H   | 2.02997300  | -1.60026900 | 0.24438000  |
| O   | 0.77448800  | 3.66190000  | -0.10506500 |
| O   | -0.90602000 | 2.21989700  | 0.09343100  |
| N   | -4.70941300 | -0.57343400 | 0.60235000  |
| C   | -5.57343300 | 0.61124500  | 0.80590300  |
| C   | -6.01097800 | 1.29584600  | -0.48946300 |
| H   | -5.05409400 | 1.31429600  | 1.46057800  |
| H   | -6.44817200 | 0.26376100  | 1.35651500  |
| H   | -6.62576400 | 2.16593700  | -0.23894500 |
| H   | -5.15477300 | 1.64177900  | -1.07528000 |
| H   | -6.60741300 | 0.62424300  | -1.11198500 |
| C   | -5.38836300 | -1.88942400 | 0.57991300  |
| C   | -5.77555900 | -2.36630100 | -0.81996200 |
| H   | -6.27996500 | -1.78672500 | 1.20003000  |
| H   | -4.74892200 | -2.62217600 | 1.07481200  |
| H   | -6.25715300 | -3.34582800 | -0.73956100 |
| H   | -6.47939900 | -1.67816100 | -1.29483600 |
| H   | -4.89992900 | -2.46861200 | -1.46741100 |
| C   | 2.60698300  | 1.33410200  | -0.68199900 |
| H   | 3.23672100  | 2.21309900  | -0.76001200 |

|   |            |             |             |
|---|------------|-------------|-------------|
| C | 3.11591500 | -0.06105000 | -0.91100400 |
| H | 3.38837900 | -0.13686100 | -1.97279100 |
| C | 4.33801100 | -0.35849600 | -0.07542200 |
| C | 4.52142400 | -0.13876000 | 1.26668500  |
| S | 5.76585900 | -1.07937000 | -0.77968800 |
| C | 5.80476800 | -0.55258100 | 1.73697500  |
| H | 3.76013200 | 0.30353400  | 1.90035600  |
| C | 6.58854500 | -1.08111500 | 0.74895600  |
| H | 6.12889900 | -0.45902300 | 2.76721300  |
| H | 7.59497100 | -1.47154800 | 0.82047700  |

## 1B-IM2

|     |             |             |             |
|-----|-------------|-------------|-------------|
| 1 1 |             |             |             |
| C   | 0.48984600  | 1.54713700  | -0.38075700 |
| C   | 0.04152700  | 0.18491700  | -0.44607600 |
| C   | -1.27809800 | -0.12001200 | -0.19670400 |
| C   | -2.17096100 | 0.95530300  | 0.14048600  |
| C   | -0.41880200 | 2.63761900  | -0.02414300 |
| H   | -1.20257800 | -2.26696500 | -0.50496000 |
| C   | -1.84654500 | -1.43430600 | -0.24320300 |
| C   | -3.49489200 | 0.75641900  | 0.40986600  |
| C   | -4.04653600 | -0.56594500 | 0.37387800  |
| C   | -3.16161200 | -1.65587200 | 0.02420300  |
| H   | -4.09815200 | 1.61911300  | 0.65184400  |
| H   | -3.54204300 | -2.66489700 | -0.03902900 |
| C   | 1.20061400  | -0.69506600 | -0.80537400 |
| H   | 0.97268800  | -1.33684800 | -1.66125000 |
| H   | 1.44650100  | -1.35251700 | 0.03473400  |
| O   | -0.14058200 | 3.81230900  | 0.07603600  |
| O   | -1.72880800 | 2.26269400  | 0.21486800  |
| N   | -5.33897000 | -0.78588800 | 0.66790300  |
| C   | -6.27182400 | 0.33115200  | 0.94073900  |
| C   | -6.76750500 | 1.04957600  | -0.31479200 |
| H   | -5.78792200 | 1.03277000  | 1.62382100  |
| H   | -7.11616800 | -0.09709000 | 1.48160600  |
| H   | -7.43849700 | 1.86098000  | -0.01618000 |
| H   | -5.94289500 | 1.48397900  | -0.88671900 |
| H   | -7.32139200 | 0.37055300  | -0.96788800 |
| C   | -5.92998700 | -2.14294100 | 0.63288300  |
| C   | -6.38030800 | -2.59096200 | -0.75737500 |
| H   | -6.78203700 | -2.12431100 | 1.31406500  |

|   |             |             |             |
|---|-------------|-------------|-------------|
| H | -5.21309600 | -2.84889600 | 1.05498100  |
| H | -6.78996900 | -3.60352600 | -0.68818700 |
| H | -7.15881700 | -1.93466400 | -1.15467300 |
| H | -5.54588000 | -2.60768500 | -1.46448800 |
| C | 1.79938400  | 1.64442200  | -0.73410600 |
| H | 2.37308900  | 2.56316600  | -0.77742000 |
| C | 2.37357300  | 0.30315000  | -1.09120400 |
| H | 2.56980000  | 0.32304800  | -2.17295500 |
| C | 3.66815200  | 0.02753300  | -0.36949700 |
| C | 3.97052900  | 0.23619100  | 0.94785000  |
| S | 5.04555400  | -0.66841300 | -1.21747800 |
| C | 5.29634100  | -0.15287500 | 1.32045200  |
| H | 3.25990900  | 0.65814900  | 1.65101900  |
| C | 5.99631500  | -0.65980800 | 0.25773300  |
| H | 5.69811300  | -0.05798100 | 2.32067900  |
| O | 7.25538600  | -1.14133500 | 0.15952400  |
| C | 8.01704100  | -1.13417800 | 1.37930600  |
| H | 7.53148800  | -1.75362000 | 2.14003900  |
| H | 8.99021100  | -1.55277600 | 1.12401000  |
| H | 8.13610200  | -0.11224500 | 1.75287100  |

## 1a-IM2

11

|   |             |             |             |
|---|-------------|-------------|-------------|
| C | 1.32183900  | 1.33812600  | -0.40076700 |
| C | 0.78989300  | 0.00572100  | -0.44250500 |
| C | -0.54913400 | -0.21058700 | -0.20212200 |
| C | -1.37515500 | 0.92593700  | 0.10173800  |
| C | 0.47995900  | 2.49173500  | -0.08188700 |
| H | -0.60670800 | -2.36486100 | -0.45998800 |
| C | -1.19965700 | -1.48679900 | -0.22740100 |
| C | -2.71234000 | 0.81741200  | 0.35775300  |
| C | -3.34771800 | -0.46659600 | 0.33759200  |
| C | -2.52997600 | -1.61817900 | 0.02475600  |
| H | -3.26337400 | 1.72107300  | 0.57319700  |
| H | -2.97409200 | -2.60207000 | -0.01783400 |
| C | 1.89910600  | -0.94989900 | -0.76386900 |
| H | 1.64826800  | -1.59125600 | -1.61385500 |
| H | 2.07892500  | -1.61148300 | 0.09052100  |
| O | 0.82971600  | 3.64910100  | -0.00763000 |
| O | -0.85275900 | 2.20458800  | 0.15319800  |
| N | -4.65667700 | -0.59634700 | 0.61266000  |



|   |             |             |             |
|---|-------------|-------------|-------------|
| C | -5.51282500 | 0.58239400  | 0.87494500  |
| C | -5.96382600 | 1.32171400  | -0.38535200 |
| H | -4.98242200 | 1.25635200  | 1.55122500  |
| H | -6.38239000 | 0.21605800  | 1.42142600  |
| H | -6.57500000 | 2.18070100  | -0.09132900 |
| H | -5.11424700 | 1.69220900  | -0.96564400 |
| H | -6.56781300 | 0.67742500  | -1.02906100 |
| C | -5.33945100 | -1.90899900 | 0.56074400  |
| C | -5.77901000 | -2.32717400 | -0.84250200 |
| H | -6.20749400 | -1.83124900 | 1.21723000  |
| H | -4.68457100 | -2.66232200 | 1.00138400  |
| H | -6.25591000 | -3.31069400 | -0.78645700 |
| H | -6.50119000 | -1.62154500 | -1.26086400 |
| H | -4.92801000 | -2.39862900 | -1.52607200 |
| C | 2.64322800  | 1.34092300  | -0.72347000 |
| H | 3.27304900  | 2.22265000  | -0.76894200 |
| C | 3.13738900  | -0.03894600 | -1.04519700 |
| H | 3.36224000  | -0.05327500 | -2.12098000 |
| C | 4.41666600  | -0.40907800 | -0.30697700 |
| C | 4.47837900  | -0.34413500 | 1.09300400  |
| C | 5.55047200  | -0.81756000 | -1.01866300 |
| C | 5.65143200  | -0.68690000 | 1.76573200  |
| H | 3.60533400  | -0.02676900 | 1.65729500  |
| C | 6.72458900  | -1.16249300 | -0.34552600 |
| H | 5.51198200  | -0.86731100 | -2.10344000 |
| C | 6.77807500  | -1.09729200 | 1.04794500  |
| H | 5.68635800  | -0.63152100 | 2.84974400  |
| H | 7.59563200  | -1.48060600 | -0.91072500 |
| H | 7.69090400  | -1.36391500 | 1.57218100  |

## 1b-IM2

1 1

|   |             |             |             |
|---|-------------|-------------|-------------|
| C | -0.05194700 | 1.64275500  | 0.41332500  |
| C | 0.36972100  | 0.28523300  | 0.60888600  |
| C | 1.66351800  | -0.08510600 | 0.31327200  |
| C | 2.55424000  | 0.91682800  | -0.20451800 |
| C | 0.85451400  | 2.65829700  | -0.12288200 |
| H | 1.56220100  | -2.17911500 | 0.87202400  |
| C | 2.20578500  | -1.40058400 | 0.47692200  |
| C | 3.85331600  | 0.65036900  | -0.53201300 |
| C | 4.37965600  | -0.67259300 | -0.37136200 |

|   |              |             |             |
|---|--------------|-------------|-------------|
| C | 3.49652100   | -1.68882800 | 0.15795700  |
| H | 4.45803700   | 1.46216200  | -0.90888800 |
| H | 3.85827500   | -2.69487000 | 0.31315500  |
| C | -0.78638900  | -0.51162700 | 1.13403500  |
| H | -0.52493500  | -1.04806200 | 2.05108400  |
| H | -1.08183300  | -1.26757300 | 0.39847100  |
| O | 0.59710000   | 3.82217300  | -0.33981400 |
| O | 2.13666800   | 2.21953200  | -0.40212300 |
| N | 5.64727800   | -0.96155600 | -0.71255300 |
| C | 6.57728900   | 0.08486500  | -1.19303100 |
| C | 7.19727400   | 0.92842500  | -0.07838500 |
| H | 6.05037700   | 0.71819100  | -1.90990500 |
| H | 7.36061100   | -0.42992300 | -1.75047900 |
| H | 7.85337400   | 1.68070800  | -0.52723000 |
| H | 6.43486300   | 1.44868600  | 0.50810800  |
| H | 7.79577300   | 0.31404700  | 0.59896100  |
| C | 6.21940600   | -2.31328600 | -0.51905600 |
| C | 6.70918600   | -2.58482600 | 0.90345100  |
| H | 7.04906800   | -2.39967700 | -1.22196900 |
| H | 5.47877100   | -3.05492800 | -0.82324600 |
| H | 7.09479400   | -3.60775600 | 0.95694100  |
| H | 7.51499400   | -1.90177700 | 1.18371600  |
| H | 5.90171200   | -2.48613400 | 1.63458000  |
| C | -1.34036200  | 1.81084300  | 0.81720200  |
| H | -1.88970800  | 2.74512800  | 0.77892100  |
| C | -1.92415100  | 0.53731600  | 1.35501000  |
| H | -2.07676700  | 0.68744100  | 2.43320200  |
| C | -3.27549600  | 0.19347900  | 0.74648300  |
| C | -3.43002000  | 0.06876500  | -0.64482600 |
| C | -4.39580500  | -0.00474200 | 1.55632000  |
| C | -4.66155700  | -0.25055000 | -1.20095800 |
| H | -2.57683400  | 0.22105600  | -1.30052400 |
| C | -5.64293000  | -0.32816800 | 1.01384000  |
| H | -4.30071400  | 0.09019200  | 2.63465100  |
| C | -5.77827700  | -0.45230900 | -0.37383700 |
| H | -4.78115600  | -0.34762600 | -2.27535800 |
| H | -6.48763300  | -0.47909800 | 1.67454600  |
| O | -6.94563700  | -0.76535300 | -1.01620600 |
| C | -8.12917100  | -0.98239300 | -0.22434800 |
| C | -9.26001300  | -1.31425800 | -1.17623900 |
| H | -8.35228800  | -0.07761900 | 0.35409700  |
| H | -7.95197900  | -1.80424100 | 0.47989600  |
| H | -10.17908500 | -1.48520800 | -0.60792800 |
| H | -9.43582500  | -0.49208400 | -1.87641800 |

|   |             |             |             |
|---|-------------|-------------|-------------|
| H | -9.03592200 | -2.21927100 | -1.74888300 |
|---|-------------|-------------|-------------|

## 1A-F

0 1

|   |             |             |             |
|---|-------------|-------------|-------------|
| C | 1.09054700  | 1.21096900  | 0.13103800  |
| C | 0.58267300  | -0.05570500 | 0.05957700  |
| C | -0.82200200 | -0.28177400 | 0.14008500  |
| C | -1.65087000 | 0.85402700  | 0.28597500  |
| C | 0.25998700  | 2.36097500  | 0.28590000  |
| H | -0.87400900 | -2.43170500 | -0.03823900 |
| C | -1.47208300 | -1.53320900 | 0.07773900  |
| C | -3.03093700 | 0.77308200  | 0.36807000  |
| C | -3.67426400 | -0.48847100 | 0.31911800  |
| C | -2.84346500 | -1.64225900 | 0.15791600  |
| H | -3.58508500 | 1.69632100  | 0.46431900  |
| H | -3.28582600 | -2.62726500 | 0.09982300  |
| C | 1.69694000  | -1.06195500 | -0.06800200 |
| H | 1.48903500  | -1.84578700 | -0.80159400 |
| H | 1.84877300  | -1.55841600 | 0.89772000  |
| O | 0.62613200  | 3.53366300  | 0.35802500  |
| O | -1.11063500 | 2.12644700  | 0.34732700  |
| N | -5.03617900 | -0.60409000 | 0.45113400  |
| C | -5.88704700 | 0.58818800  | 0.56432200  |
| C | -6.20120400 | 1.29324500  | -0.75840500 |
| H | -5.41819500 | 1.28901800  | 1.26141200  |
| H | -6.81872500 | 0.26877700  | 1.03791400  |
| H | -6.79966200 | 2.18945800  | -0.56252200 |
| H | -5.28937100 | 1.60280800  | -1.27761700 |
| H | -6.77279800 | 0.64445000  | -1.42802700 |
| C | -5.71163300 | -1.89400900 | 0.24642400  |
| C | -5.84873400 | -2.33107200 | -1.21474300 |
| H | -6.70384600 | -1.80273100 | 0.69441000  |
| H | -5.19031000 | -2.66574500 | 0.82107900  |
| H | -6.34245400 | -3.30776400 | -1.26000100 |
| H | -6.45024600 | -1.61977200 | -1.78759400 |
| H | -4.87362600 | -2.42366500 | -1.70198100 |
| C | 2.92380500  | -0.19048000 | -0.46657500 |
| H | 2.90786700  | -0.08987400 | -1.55807900 |
| C | 4.25991800  | -0.73278400 | -0.03998700 |
| C | 4.60798500  | -1.41234200 | 1.09999200  |
| S | 5.67826100  | -0.46473200 | -1.03478500 |

|   |            |             |             |
|---|------------|-------------|-------------|
| C | 6.00153700 | -1.72238100 | 1.18120300  |
| H | 3.89248100 | -1.68935600 | 1.86614000  |
| C | 6.71111700 | -1.27623000 | 0.10204600  |
| H | 6.45147100 | -2.25924000 | 2.00899000  |
| H | 7.76933000 | -1.37497000 | -0.09984400 |
| C | 2.59627100 | 1.23770000  | 0.06414200  |
| H | 3.02645400 | 1.38422600  | 1.06631600  |
| O | 3.12389200 | 2.21980800  | -0.82943100 |
| H | 2.77347200 | 3.07314400  | -0.52638000 |

## 1B-F

0 1

|   |             |             |             |
|---|-------------|-------------|-------------|
| C | -0.36324500 | 1.33256400  | -0.06656800 |
| C | 0.09052100  | 0.04858700  | 0.04557700  |
| C | 1.47995200  | -0.24587200 | -0.07013400 |
| C | 2.35276800  | 0.84261200  | -0.29643900 |
| C | 0.51114200  | 2.43489200  | -0.30559500 |
| H | 1.44127500  | -2.38587100 | 0.20239200  |
| C | 2.07468600  | -1.52238400 | 0.02478100  |
| C | 3.72384600  | 0.69391500  | -0.42348800 |
| C | 4.31106100  | -0.59300500 | -0.34157000 |
| C | 3.43582400  | -1.69874900 | -0.09935000 |
| H | 4.31450800  | 1.58527300  | -0.58221800 |
| H | 3.83526200  | -2.69975400 | -0.01207700 |
| C | -1.06157000 | -0.90232700 | 0.24361900  |
| H | -0.86466000 | -1.66750000 | 0.99930500  |
| H | -1.26021300 | -1.42366100 | -0.70102500 |
| O | 0.19709400  | 3.61785700  | -0.42916400 |
| O | 1.86792300  | 2.13420300  | -0.39826200 |
| N | 5.66045500  | -0.77753500 | -0.51749900 |
| C | 6.56137500  | 0.36811400  | -0.70276000 |
| C | 6.94608500  | 1.10863500  | 0.58147400  |
| H | 6.10565700  | 1.06297500  | -1.41456400 |
| H | 7.46279800  | -0.01393100 | -1.18835700 |
| H | 7.58143700  | 1.96581200  | 0.33392500  |
| H | 6.06489500  | 1.48325500  | 1.11068300  |
| H | 7.50361500  | 0.45931100  | 1.26233200  |
| C | 6.28254200  | -2.09057100 | -0.29246800 |
| C | 6.46629000  | -2.47960400 | 1.17712200  |
| H | 7.25619400  | -2.06510000 | -0.78732600 |
| H | 5.69870300  | -2.85607700 | -0.81274500 |

|   |             |             |             |
|---|-------------|-------------|-------------|
| H | 6.90988900  | -3.47919900 | 1.23873600  |
| H | 7.13086000  | -1.78088200 | 1.69292700  |
| H | 5.51197200  | -2.50096900 | 1.71162500  |
| C | -2.23768200 | 0.03707800  | 0.63070400  |
| H | -2.18913900 | 0.18684900  | 1.71822600  |
| C | -3.59909500 | -0.47815000 | 0.26057300  |
| C | -3.96757500 | -1.68075600 | -0.27212400 |
| S | -5.03160700 | 0.51820600  | 0.55695200  |
| C | -5.38000000 | -1.84803500 | -0.46604200 |
| H | -3.25252000 | -2.45649800 | -0.52166100 |
| C | -6.08113700 | -0.74629500 | -0.06330200 |
| H | -5.83196000 | -2.73886900 | -0.88225100 |
| O | -7.40854300 | -0.47122300 | -0.07193100 |
| C | -8.24724300 | -1.50868800 | -0.60404500 |
| H | -8.15299700 | -2.42451000 | -0.01133100 |
| H | -9.26737200 | -1.13004400 | -0.54133600 |
| H | -7.98993500 | -1.71630000 | -1.64789800 |
| C | -1.86436400 | 1.42411700  | 0.03413900  |
| H | -2.31157100 | 1.55225100  | -0.96297200 |
| O | -2.33210400 | 2.45959400  | 0.90173600  |
| H | -2.01421200 | 3.29497600  | 0.52322600  |

### 1a-F

|     |             |             |             |
|-----|-------------|-------------|-------------|
| 0 1 |             |             |             |
| C   | 1.11481500  | 1.27928100  | 0.01101300  |
| C   | 0.63232400  | 0.00253500  | -0.05542400 |
| C   | -0.76401800 | -0.25498600 | 0.06985300  |
| C   | -1.61214700 | 0.86043900  | 0.25459800  |
| C   | 0.26442500  | 2.40891600  | 0.20385900  |
| H   | -0.77436800 | -2.40355700 | -0.12693400 |
| C   | -1.38815000 | -1.51987500 | 0.01740800  |
| C   | -2.98677100 | 0.74820400  | 0.38149000  |
| C   | -3.60366600 | -0.52662700 | 0.34053800  |
| C   | -2.75356500 | -1.66019500 | 0.14166800  |
| H   | -3.55727300 | 1.65810500  | 0.50516500  |
| H   | -3.17599100 | -2.65422000 | 0.08871500  |
| C   | 1.76343200  | -0.97699400 | -0.23065800 |
| H   | 1.55036800  | -1.74780600 | -0.97723100 |
| H   | 1.94974000  | -1.49579800 | 0.71791600  |
| O   | 0.60570500  | 3.58940500  | 0.27360400  |
| O   | -1.09817900 | 2.14377000  | 0.30957700  |

|   |             |             |             |
|---|-------------|-------------|-------------|
| N | -4.95816600 | -0.67349900 | 0.51430900  |
| C | -5.83144700 | 0.49868800  | 0.66124700  |
| C | -6.19714800 | 1.20767200  | -0.64612700 |
| H | -5.35952000 | 1.20415200  | 1.35160400  |
| H | -6.74244700 | 0.15449800  | 1.15721300  |
| H | -6.80949100 | 2.08879300  | -0.42615700 |
| H | -5.30670200 | 1.54165500  | -1.18690000 |
| H | -6.77231200 | 0.55201900  | -1.30592300 |
| C | -5.61094800 | -1.97619800 | 0.31789800  |
| C | -5.78557900 | -2.40229200 | -1.14256100 |
| H | -6.58989600 | -1.91197200 | 0.79862000  |
| H | -5.05373000 | -2.74129200 | 0.86719500  |
| H | -6.25658200 | -3.39040400 | -1.18194000 |
| H | -6.42273300 | -1.70051400 | -1.68794500 |
| H | -4.82504700 | -2.46608500 | -1.66231100 |
| C | 2.97130500  | -0.07736700 | -0.63548900 |
| H | 2.95399800  | 0.02178200  | -1.72640400 |
| C | 4.33262300  | -0.59806400 | -0.22414200 |
| C | 4.64046700  | -0.84992200 | 1.12277200  |
| C | 5.32316900  | -0.83147100 | -1.18705600 |
| C | 5.90070700  | -1.31987200 | 1.49298300  |
| H | 3.88876900  | -0.67691300 | 1.88854300  |
| C | 6.58655500  | -1.30270000 | -0.82044100 |
| H | 5.10164100  | -0.64175200 | -2.23410800 |
| C | 6.87976100  | -1.54838700 | 0.52164300  |
| H | 6.11902200  | -1.50793100 | 2.54036800  |
| H | 7.33931500  | -1.47637400 | -1.58409600 |
| H | 7.86065000  | -1.91469200 | 0.81002700  |
| C | 2.61733700  | 1.33891200  | -0.09861700 |
| H | 3.06711200  | 1.50773500  | 0.89151200  |
| O | 3.09658500  | 2.33428000  | -1.00801200 |
| H | 2.72886400  | 3.17725700  | -0.69716900 |

### 1b-F

|    |            |             |             |
|----|------------|-------------|-------------|
| 01 |            |             |             |
| C  | 0.12552800 | 1.57022700  | -0.01764100 |
| C  | 0.46426300 | 0.25010400  | 0.08511800  |
| C  | 1.82072200 | -0.16629700 | -0.04921700 |
| C  | 2.78552200 | 0.84028800  | -0.27966300 |
| C  | 1.09362500 | 2.59008000  | -0.26114400 |
| H  | 1.59241800 | -2.29512800 | 0.21599800  |

|   |              |             |             |
|---|--------------|-------------|-------------|
| C | 2.29921700   | -1.49130400 | 0.03512500  |
| C | 4.13668800   | 0.56970000  | -0.42004100 |
| C | 4.60669000   | -0.76512300 | -0.34845600 |
| C | 3.63779400   | -1.78889300 | -0.10285000 |
| H | 4.80419200   | 1.40451300  | -0.58174300 |
| H | 3.94592800   | -2.82215600 | -0.02154200 |
| C | -0.76610500  | -0.59051900 | 0.30622300  |
| H | -0.62727800  | -1.36231300 | 1.06914900  |
| H | -1.02938200  | -1.10735800 | -0.62526700 |
| O | 0.88680300   | 3.79831400  | -0.37258800 |
| O | 2.41703800   | 2.17056000  | -0.37106400 |
| N | 5.93309400   | -1.06789800 | -0.53692400 |
| C | 6.93288900   | -0.00454500 | -0.70652700 |
| C | 7.37025300   | 0.69026600  | 0.58635400  |
| H | 6.54640700   | 0.73330800  | -1.41640300 |
| H | 7.80134400   | -0.46122700 | -1.18759700 |
| H | 8.08516100   | 1.48597800  | 0.35085800  |
| H | 6.52215700   | 1.14287900  | 1.10858500  |
| H | 7.85707100   | -0.01175900 | 1.26907900  |
| C | 6.43535300   | -2.43599200 | -0.34399000 |
| C | 6.61511000   | -2.86365800 | 1.11530200  |
| H | 7.39566700   | -2.49305100 | -0.86180700 |
| H | 5.77165100   | -3.13563400 | -0.86081700 |
| H | 6.96365600   | -3.90139100 | 1.15274400  |
| H | 7.35453700   | -2.23905000 | 1.62427400  |
| H | 5.67527600   | -2.80309300 | 1.67207900  |
| C | -1.85639900  | 0.45066100  | 0.70569600  |
| H | -1.79527400  | 0.58506400  | 1.79154200  |
| C | -3.27702000  | 0.06654300  | 0.35223200  |
| C | -3.66610400  | -0.17093100 | -0.97839200 |
| C | -4.25182800  | -0.06482500 | 1.34481400  |
| C | -4.97121200  | -0.52466300 | -1.29706900 |
| H | -2.93736200  | -0.07877200 | -1.77942600 |
| C | -5.57157000  | -0.42109300 | 1.04574600  |
| H | -3.98207300  | 0.11326400  | 2.38261200  |
| C | -5.93483700  | -0.65414500 | -0.28436600 |
| H | -5.26538200  | -0.70693100 | -2.32607500 |
| H | -6.29359900  | -0.51161100 | 1.84806800  |
| O | -7.19296300  | -1.01153600 | -0.69905400 |
| C | -8.22062800  | -1.17069500 | 0.29545300  |
| C | -9.49338800  | -1.57274400 | -0.42186000 |
| H | -8.35593300  | -0.22676800 | 0.83770900  |
| H | -7.91636800  | -1.93862600 | 1.01735000  |
| H | -10.29937200 | -1.70321000 | 0.30640000  |

|   |             |             |             |
|---|-------------|-------------|-------------|
| H | -9.79790600 | -0.80384500 | -1.13831400 |
| H | -9.35812500 | -2.51658600 | -0.95864400 |
| C | -1.36015500 | 1.79762200  | 0.10837300  |
| H | -1.80481100 | 1.97521300  | -0.88266200 |
| O | -1.71528200 | 2.87403500  | 0.98174300  |
| H | -1.27548600 | 3.66221000  | 0.62471100  |
